# Supplementary material for: Lamivudine/telbivudine-associated neuromyopathy: neurogenic damage, mitochondrial dysfunction and mitochondrial DNA depletion
Source: PubMed Central journal article supplement — J Clin Pathol. 2014 Sep 4;67(11):999–1005. doi: 10.1136/jclinpath-2013-202069 (PMC4215273; doi:10.1136/jclinpath-2013-202069), 2014-09-04
Supplement: jclinpath-2013-202069-s1.pdf [file jclinpath-2013-202069-s1.pdf]

摘要：

**目的：**在用拉米夫定或替比夫定治疗乙肝病毒的过程中可能出现神经肌肉受累。本研究描述拉米夫定/替比夫定导致的神经肌肉病变的病理学特点。

**方法：**我们回顾分析了6例使用拉米夫定/替比夫定后出现神经肌肉受累的患者。该6例患者进行了神经和肌肉活检，对所取标本进行了光镜和电子显微镜观察分析。从冰冻的肌肉标本中提取这6例患者的基因组DNA，并用实时定量PCR的方法对肌细胞中线粒体DNA含量进行定量分析。

**结果：**患者停药或者换药为恩替卡韦后肌肉受累的症状可以恢复。所有患者的神经肌肉病理表现类似。实时定量PCR结果显示受累肌肉细胞中线粒体DNA的数目是减少的。

**结论：**线粒体DNA数目减少可能导致了拉米夫定/替比夫定相关的神经肌肉疾病。肌肉病理表现为线粒体功能障碍合并神经源性损伤。神经损伤为亚急性的轴索性周围神经病。线粒体超微结构变化包括空泡化，线粒体嵴的数目减少和基质的均质化。

Disclaimer: BMJ Publishing Group Limited takes no responsibility for the accuracy of the translation from the published English original and is not liable for any errors which may occur.
